# Supplementary material
Source: PubMed Central journal article supplement (PMC3109541)
Supplement: supp_blood-2010-09-299719_Document1.pdf [file supp_blood-2010-09-299719_Document1.pdf]

**Table S1. List of miRNAs expressed in platelets on microarray**  
*Ordered from highest to lowest intensity*

| <b>miRNA</b>    | <b>Mean Hy3 intensity</b> |
|-----------------|---------------------------|
| hsa-miR-223     | 46787.5                   |
| hsa-miR-26b     | 45289.5                   |
| hsa-miR-26a     | 32285                     |
| hsa-miR-23a     | 28194                     |
| hsa-miR-126     | 27506.5                   |
| hsa-miR-21      | 27292                     |
| hsa-let-7f      | 25011                     |
| hsa-miR-22      | 22045                     |
| hsa-miR-24      | 20431.5                   |
| hsa-miR-720     | 19662                     |
| hsa-miR-16      | 18449                     |
| hsa-miR-23b     | 17502                     |
| hsa-miR-142-3p  | 15595.5                   |
| hsa-miR-142-5p  | 13715.5                   |
| hsa-miR-191     | 13172.5                   |
| hsa-miR-451     | 12908.5                   |
| hsa-miR-30b     | 11444.5                   |
| hsa-miR-15b     | 11392.5                   |
| hsa-let-7a      | 11026                     |
| hsa-miR-1826    | 10984.5                   |
| hsa-miR-17      | 10085.5                   |
| hsa-miR-103     | 8905.5                    |
| hsa-miR-106a    | 8465.5                    |
| hsa-miR-30c     | 8384.5                    |
| hsa-miR-130a    | 8026.5                    |
| hsa-let-7g      | 7777.5                    |
| hsa-miR-30a     | 7284                      |
| hsa-miR-146b-5p | 6242                      |
| hsa-miR-34b     | 5972                      |
| hsa-miR-106b    | 5644                      |
| hsa-miR-15a     | 5580                      |
| hsa-miR-374a    | 5476.5                    |
| hsa-miR-20a     | 5407.5                    |
| hsa-miR-185     | 5177.5                    |
| hsa-miR-146a    | 4895.5                    |
| hsa-let-7i      | 4734                      |
| hsa-let-7c      | 4516                      |
| hsa-miR-19a     | 4384                      |
| hsa-let-7d      | 4283.5                    |
| hsa-miR-27a     | 4194.5                    |
| hsa-miR-320a    | 4164.5                    |
| hsa-miR-93      | 4153                      |
| hsa-miR-126*    | 4109.5                    |
| hsa-miR-320b    | 3943                      |
| hsa-miR-222     | 3708.5                    |

| <b>miRNA</b>                    | <b>Mean Hy3 intensity</b> |
|---------------------------------|---------------------------|
| hsa-miR-151-5p                  | 3529.5                    |
| hsa-miR-320c                    | 3435.5                    |
| hsa-miR-107                     | 3378                      |
| hsa-miR-1308                    | 3343                      |
| hsa-miR-199a-3p/hsa-miR-199b-3p | 3081.5                    |
| hsa-miR-199a-5p                 | 2994                      |
| hsa-miR-28-5p                   | 2990.5                    |
| hsa-miR-339-5p                  | 2927                      |
| hsa-miR-30e                     | 2848                      |
| hsa-let-7b                      | 2723                      |
| hsa-miR-423-3p                  | 2544                      |
| hsa-miR-221                     | 2474                      |
| hsa-miR-29a                     | 2437.5                    |
| hsa-miR-423-5p                  | 2416                      |
| hsa-miR-1285                    | 2398                      |
| hsa-miR-320d                    | 2372                      |
| hsa-miR-425                     | 2263.5                    |
| hsa-miR-744                     | 2261.5                    |
| hsa-miR-19b                     | 2223.5                    |
| hsa-miR-335                     | 2153                      |
| hsa-miR-30d                     | 2135.5                    |
| hsa-miR-1280                    | 2104.5                    |
| hsa-miR-551b                    | 2071                      |
| hsa-miR-491-3p                  | 2070                      |
| hsa-let-7e                      | 2012                      |
| hsa-miR-151-3p                  | 1969.5                    |
| hsa-miR-625                     | 1966                      |
| hsa-miR-101                     | 1959                      |
| hsa-miR-148b                    | 1933                      |
| hsa-miR-18a                     | 1846.5                    |
| hsa-miR-125a-5p                 | 1791.5                    |
| hsa-miR-140-3p                  | 1766.5                    |
| hsa-miR-18b                     | 1688.5                    |
| hsa-miR-374b                    | 1561.5                    |
| hsa-miR-1297                    | 1551                      |
| hsa-miR-331-3p                  | 1532                      |
| hsa-miR-1264                    | 1454                      |
| hsa-miR-98                      | 1444                      |
| hsa-miR-342-3p                  | 1428.5                    |
| hsa-miR-301a                    | 1379.5                    |
| hsa-miR-584                     | 1308.5                    |
| hsa-miR-186                     | 1280.5                    |
| hsa-miR-195                     | 1252.5                    |
| hsa-miR-361-5p                  | 1072.5                    |
| hsa-miR-30e*                    | 1060                      |
| hsa-miR-25                      | 1055                      |
| hsa-miR-486-5p                  | 1037                      |

| <b>miRNA</b>    | <b>Mean Hy3 intensity</b> |
|-----------------|---------------------------|
| hsa-miR-143     | 953                       |
| hsa-miR-22*     | 949                       |
| hsa-miR-181a    | 939                       |
| hsa-miR-20b     | 917                       |
| hsa-miR-652     | 825                       |
| hsa-miR-340     | 809.5                     |
| hsa-miR-29c     | 778                       |
| hsa-miR-130b    | 771.5                     |
| hsa-miR-99b     | 766.5                     |
| hsa-miR-1827    | 740                       |
| hsa-miR-29b     | 671.5                     |
| hsa-miR-487b    | 607                       |
| hsa-miR-376c    | 606.5                     |
| hsa-miR-140-5p  | 601.5                     |
| hsa-miR-92a     | 600                       |
| hsa-miR-92b     | 583.5                     |
| hsa-miR-933     | 569                       |
| hsa-miR-424     | 548.5                     |
| hsa-miR-494     | 547                       |
| hsa-miR-1908    | 511.5                     |
| hsa-miR-32      | 485.5                     |
| hsa-miR-425*    | 472.5                     |
| hsa-miR-326     | 467                       |
| hsa-miR-125b-1* | 461                       |
| hsa-miR-152     | 456                       |
| hsa-miR-1274a   | 446                       |
| hsa-miR-197     | 445.5                     |
| hsa-miR-377     | 427.5                     |
| hsa-miR-144     | 425.5                     |
| hsa-miR-129*    | 424.5                     |
| hsa-miR-27b     | 399.5                     |
| hsa-miR-33a     | 379                       |
| hsa-miR-654-3p  | 377.5                     |
| hsa-miR-185*    | 363.5                     |
| hsa-miR-24-1*   | 363                       |
| hsa-miR-363     | 358                       |
| hsa-miR-128     | 355                       |
| hsa-miR-138-1*  | 337                       |
| hsa-miR-337-3p  | 333.5                     |
| hsa-miR-1301    | 331.5                     |
| hsa-miR-519d    | 331                       |
| hsa-miR-125b    | 312.5                     |
| hsa-miR-103-2*  | 308.5                     |
| hsa-miR-10a     | 303                       |
| hsa-miR-32*     | 290.5                     |
| hsa-miR-665     | 289.5                     |
| hsa-miR-148a    | 288                       |

| <b>miRNA</b>    | <b>Mean Hy3 intensity</b> |
|-----------------|---------------------------|
| hsa-miR-337-5p  | 280                       |
| hsa-miR-409-3p  | 279.5                     |
| hsa-let-7d*     | 274                       |
| hsa-miR-495     | 273                       |
| hsa-miR-190     | 267                       |
| hsa-miR-888*    | 264.5                     |
| hsa-miR-505     | 257.5                     |
| hsa-miR-24-2*   | 252.5                     |
| hsa-miR-574-5p  | 252                       |
| hsa-miR-411*    | 250                       |
| hsa-miR-519e    | 250                       |
| hsa-miR-145     | 246                       |
| hsa-miR-628-3p  | 242                       |
| hsa-miR-1       | 241                       |
| hsa-miR-378     | 236                       |
| hsa-miR-339-3p  | 232.5                     |
| hsa-miR-1274b   | 228.5                     |
| hsa-miR-155     | 225.5                     |
| hsa-miR-766     | 225.5                     |
| hsa-miR-16-2*   | 223.5                     |
| hsa-miR-342-5p  | 220                       |
| hsa-miR-574-3p  | 220                       |
| hsa-miR-765     | 219.5                     |
| hsa-miR-599     | 218.5                     |
| hsa-miR-1246    | 218                       |
| hsa-miR-20a*    | 215                       |
| hsa-miR-484     | 215                       |
| hsa-miR-106b*   | 213.5                     |
| hsa-miR-369-3p  | 210                       |
| hsa-miR-485-3p  | 206.5                     |
| hsa-miR-17*     | 202                       |
| hsa-miR-620     | 199                       |
| hsa-miR-7       | 190.5                     |
| hsa-miR-642     | 189.5                     |
| hsa-miR-886-3p  | 181                       |
| hsa-miR-379     | 175.5                     |
| hsa-miR-1261    | 175                       |
| hsa-miR-600     | 173.5                     |
| hsa-miR-1307    | 171                       |
| hsa-miR-493*    | 171                       |
| hsa-miR-877     | 165                       |
| hsa-miR-193b*   | 164                       |
| hsa-miR-548c-5p | 163.5                     |
| hsa-miR-1265    | 159.5                     |
| hsa-miR-381     | 155                       |
| hsa-miR-301b    | 154                       |
| hsa-miR-505*    | 150.5                     |

| <b>miRNA</b>                | <b>Mean Hy3 intensity</b> |
|-----------------------------|---------------------------|
| hsa-miR-1290                | 148.5                     |
| hsa-miR-376a                | 146.5                     |
| hsa-miR-379*                | 145                       |
| hsa-miR-411                 | 145                       |
| hsa-miR-361-3p              | 144.5                     |
| hsa-miR-376a*               | 144                       |
| hsa-miR-328                 | 143                       |
| hsa-miR-518a-5p/hsa-miR-527 | 143                       |
| hsa-miR-208a                | 143                       |
| hsa-miR-133a                | 141.5                     |
| hsa-miR-338-3p              | 141                       |
| hsa-miR-133b                | 141                       |
| hsa-miR-223*                | 138.5                     |
| hsa-miR-200c                | 138.5                     |
| hsa-miR-576-3p              | 137.5                     |
| hsa-miR-576-5p              | 136.5                     |
| hsa-miR-374b*               | 134.5                     |
| hsa-miR-224                 | 132.5                     |
| hsa-miR-548d-5p             | 131.5                     |
| hsa-miR-382                 | 130.5                     |
| hsa-miR-184                 | 127.5                     |
| hsa-miR-300                 | 120.5                     |
| hsa-let-7a*                 | 117                       |
| hsa-miR-200b                | 116.5                     |
| hsa-miR-324-5p              | 115                       |
| hsa-miR-221*                | 114.5                     |
| hsa-miR-421                 | 114.5                     |
| hsa-miR-329                 | 114.5                     |
| hsa-miR-664                 | 114                       |
| hsa-miR-28-3p               | 113.5                     |
| hsa-miR-1255a               | 112.5                     |
| hsa-miR-99b*                | 111                       |
| hsa-miR-634                 | 110.5                     |
| hsa-miR-144*                | 110.5                     |
| hsa-miR-432                 | 110                       |
| hsa-miR-26b*                | 109                       |
| hsa-miR-491-5p              | 108.5                     |
| hsa-miR-181c                | 108                       |
| hsa-miR-376b                | 107                       |
| hsa-miR-1249                | 106.5                     |
| hsa-miR-127-3p              | 105                       |
| hsa-miR-1277                | 104.5                     |
| hsa-miR-410                 | 104.5                     |
| hsa-miR-129-5p              | 103.5                     |
| hsa-miR-181a*               | 103                       |
| hsa-miR-29c*                | 102.5                     |
| hsa-miR-182                 | 102.5                     |

| <b>miRNA</b>    | <b>Mean Hy3 intensity</b> |
|-----------------|---------------------------|
| hsa-miR-660     | 101.5                     |
| hsa-miR-629     | 100.5                     |
| hsa-miR-452     | 100.5                     |
| hsa-miR-939     | 100.5                     |
| hsa-miR-194     | 100                       |
| hsa-miR-139-5p  | 98.5                      |
| hsa-miR-1260    | 98.5                      |
| hsa-miR-21*     | 98.5                      |
| hsa-miR-374a*   | 98                        |
| hsa-miR-345     | 98                        |
| hsa-miR-26a-2*  | 97.5                      |
| hsa-miR-93*     | 97                        |
| hsa-miR-15b*    | 96.5                      |
| hsa-miR-769-5p  | 94                        |
| hsa-miR-136*    | 94                        |
| hsa-miR-1226    | 93                        |
| hsa-miR-220b    | 93                        |
| hsa-miR-549     | 92                        |
| hsa-miR-487a    | 91.5                      |
| hsa-miR-532-5p  | 91                        |
| hsa-miR-550     | 90.5                      |
| hsa-miR-500*    | 89                        |
| hsa-miR-30c-1*  | 88                        |
| hsa-miR-887     | 87.5                      |
| hsa-miR-330-3p  | 86                        |
| hsa-miR-30b*    | 85.5                      |
| hsa-let-7b*     | 83.5                      |
| hsa-miR-135a    | 83                        |
| hsa-miR-583     | 81.5                      |
| hsa-let-7f-2*   | 81                        |
| hsa-miR-889     | 81                        |
| hsa-miR-23a*    | 80                        |
| hsa-miR-18a*    | 79                        |
| hsa-miR-299-5p  | 76.5                      |
| hsa-miR-1300    | 76                        |
| hsa-miR-486-3p  | 74                        |
| hsa-miR-141     | 73.5                      |
| hsa-miR-513a-3p | 73.5                      |
| hsa-miR-589     | 72.5                      |
| hsa-let-7f-1*   | 72                        |
| hsa-miR-99a     | 71                        |
| hsa-miR-664*    | 70.5                      |
| hsa-miR-34a     | 69                        |
| hsa-miR-100     | 68                        |
| hsa-miR-369-5p  | 67.5                      |
| hsa-miR-7-1*    | 67                        |
| hsa-miR-192     | 67                        |

| <b>miRNA</b>   | <b>Mean Hy3 intensity</b> |
|----------------|---------------------------|
| hsa-miR-431    | 66                        |
| hsa-miR-154*   | 63.5                      |
| hsa-miR-134    | 63                        |
| hsa-miR-362-3p | 56.5                      |

**Table S2. List of all 41 differentially expressed miRNAs used in the Heatmap**  
*Ordered in the descending order of difference in mean expression between the hyperreactive and hyporeactive*

**miRNAs with higher mean expression in Hyporeactive platelets compared to Hyperreactive platelets**

|                |
|----------------|
| hsa-miR-376c   |
| hsa-miR-144    |
| hsa-miR-337-5p |
| hsa-miR-411    |
| hsa-miR-377    |
| hsa-miR-376a*  |
| hsa-miR-376a   |
| hsa-miR-376b   |
| hsa-miR-451    |
| hsa-miR-337-3p |
| hsa-miR-654-3p |
| hsa-miR-369-3p |
| hsa-miR-144*   |
| hsa-miR-136*   |
| hsa-miR-190    |
| hsa-miR-379*   |
| hsa-miR-379    |
| hsa-miR-493*   |
| hsa-miR-495    |
| hsa-miR-329    |
| hsa-miR-410    |
| hsa-miR-381    |
| hsa-miR-889    |
| hsa-miR-127-3p |
| hsa-miR-29b    |
| hsa-miR-19a    |
| hsa-miR-142-3p |
| hsa-miR-409-3p |
| hsa-miR-411*   |
| hsa-miR-432    |
| hsa-miR-19b    |
| hsa-miR-32     |
| hsa-miR-369-5p |
| hsa-miR-431    |

**miRNAs with higher mean expression in Hyperreactive platelets compared to Hyporeactive platelets**

|              |
|--------------|
| hsa-miR-625  |
| hsa-miR-584  |
| hsa-miR-320a |
| hsa-miR-34b  |
| hsa-miR-320c |
| hsa-miR-320b |
| hsa-miR-320d |



## Figure S1. Bioinformatic Approach to Platelet miRNA-mRNA Pairs Selection

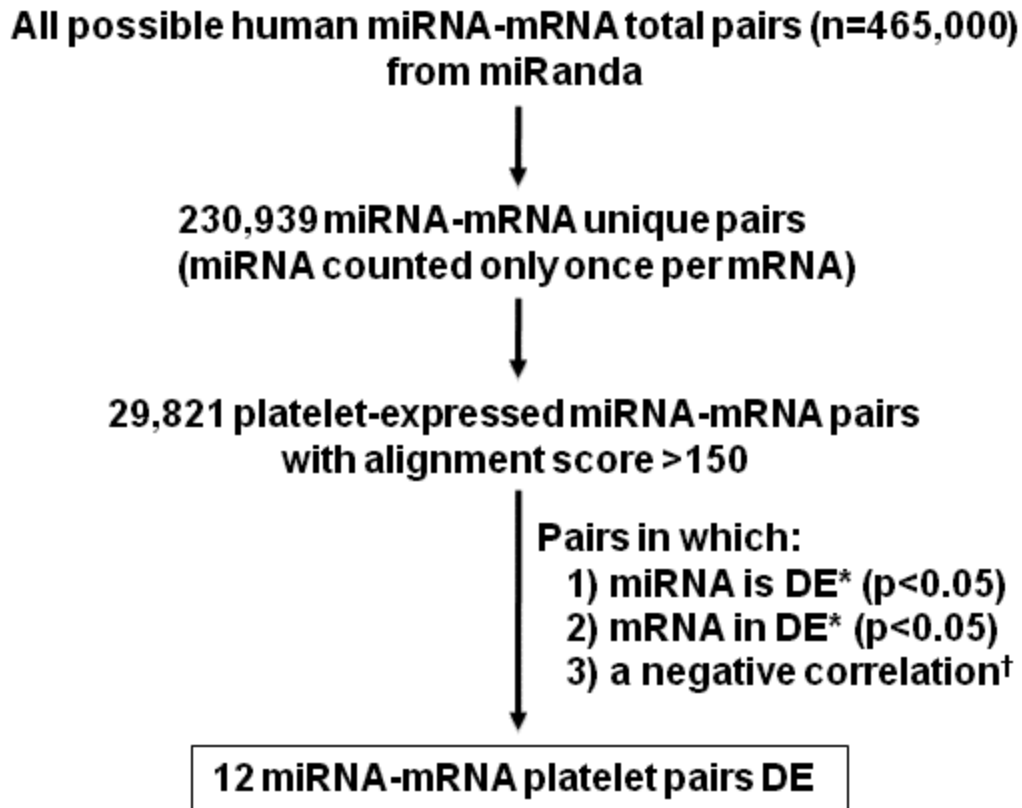

\* differentially expressed between hyper- and hypo-reactive platelets

† Direction of DE is inverse between mRNA and miRNA (shown in Fig 4)

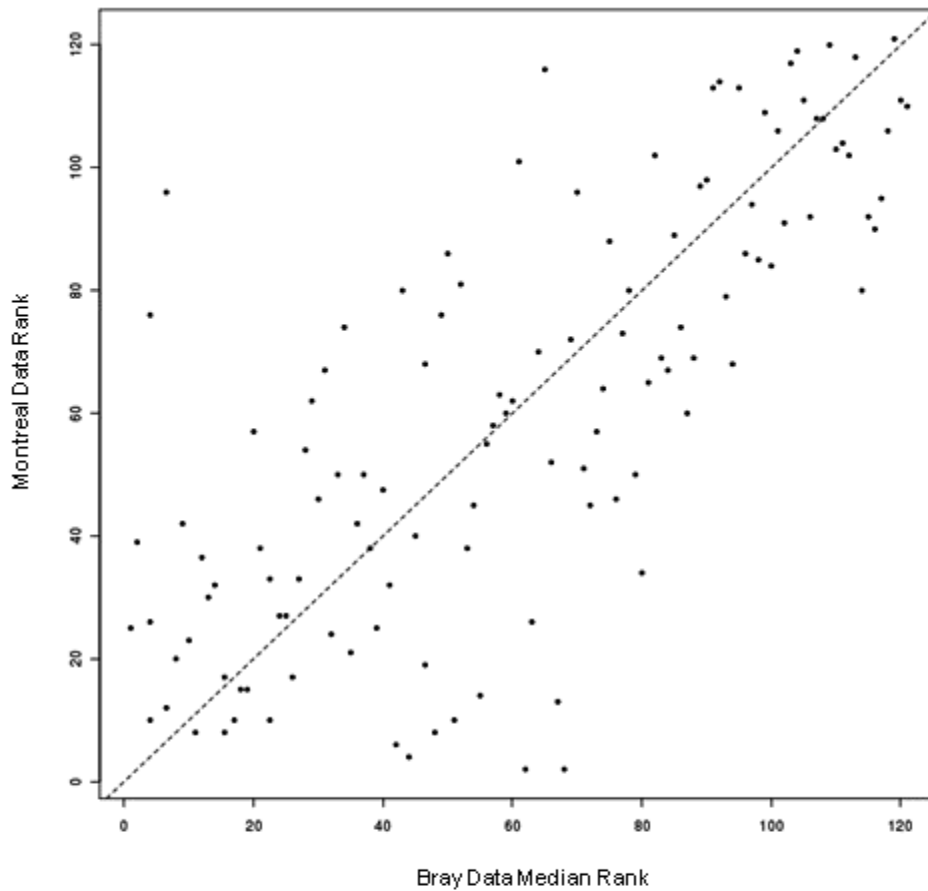

**Figure S2**

The Hy3 fluorescence across the 19 samples was analyzed to identify miRNAs showing expression in the platelet samples. We restricted our analysis to the 284 probes that had detectable values across all 19 samples and that corresponded to known miRNAs or miRNA complements. The Hy3 and Hy5 values of the 284 platelet expressed miRNAs are shown in supplemental table 1. We then determined (a) the median Hy3 intensity value across all samples and (b) the median rank Hy3 intensity.
